# Supplementary material for: Gene expression analysis of induced pluripotent stem cells from aneuploid chromosomal syndromes
Source: PubMed Central journal article supplement (PMC3852284; doi:10.1186/1471-2164-14-s5-s8), 2013-10-16

R=0.967

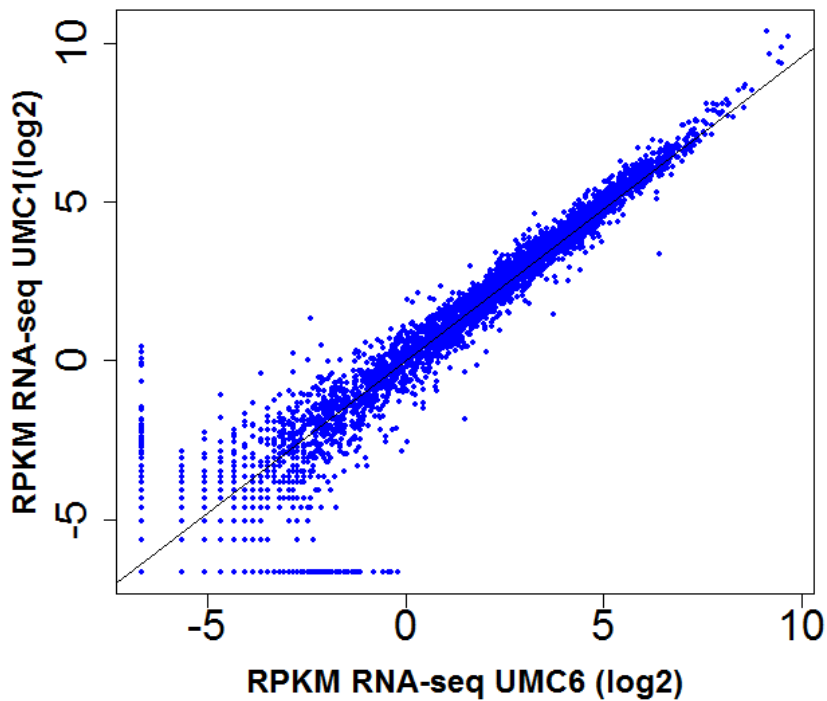

Supplement: 1471-2164-14-S5-S8-S2.pdf [file 1471-2164-14-S5-S8-S2.pdf]
