# Supplementary material for: Gene expression analysis of induced pluripotent stem cells from aneuploid chromosomal syndromes
Source: PubMed Central journal article supplement (PMC3852284; doi:10.1186/1471-2164-14-s5-s8), 2013-10-16
Supplement: 1471-2164-14-S5-S8-S4.pdf [file 1471-2164-14-S5-S8-S4.pdf]

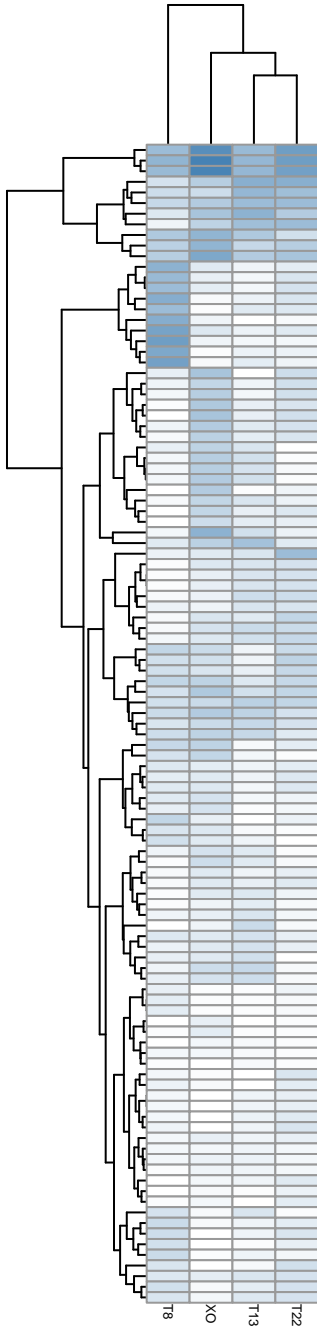

- GO:0043169-cation binding
- GO:0043167-ion binding
- GO:0046872-metal ion binding
- GO:0033279-ribosomal subunit
- GO:0005509-calcium ion binding
- GO:0006414-translational elongation
- GO:0022626-cytosolic ribosome
- GO:0042802-identical protein binding
- GO:0019226-transmission of nerve impulse
- GO:0005578-proteinaceous extracellular matrix
- GO:0031012-extracellular matrix
- GO:0022838-substrate specific channel activity
- GO:0015267-channel activity
- GO:0022803-passive transmembrane transporter activity
- GO:0005261-cation channel activity
- GO:0046873-metal ion transmembrane transporter activity
- GO:0022836-gated channel activity
- GO:0005216-ion channel activity
- GO:0006811-ion transport
- GO:0006812-cation transport
- GO:0030001-metal ion transport
- GO:0042995-cell projection
- GO:0000902-cell morphogenesis
- GO:0032989-cellular component morphogenesis
- GO:0048812-neuron projection morphogenesis
- GO:0048858-cell projection morphogenesis
- GO:0000904-cell morphogenesis involved in differentiation
- GO:0048667-cell morphogenesis involved in neuron differentiation
- GO:0042391-regulation of membrane potential
- GO:0042981-regulation of apoptosis
- GO:0010941-regulation of cell death
- GO:0043067-regulation of programmed cell death
- GO:0046914-transition metal ion binding
- GO:0031175-neuron projection development
- GO:0007409-axonogenesis
- GO:0008285-negative regulation of cell proliferation
- GO:0030030-cell projection organization
- GO:0048666-neuron development
- GO:0015934-large ribosomal subunit
- GO:0046983-protein dimerization activity
- GO:0019220-regulation of phosphate metabolic process
- GO:0051174-regulation of phosphorus metabolic process
- GO:0005840-ribosome
- GO:0051592-response to calcium ion
- GO:0005604-basement membrane
- GO:0003735-structural constituent of ribosome
- GO:0042325-regulation of phosphorylation
- GO:0044459-plasma membrane part
- GO:0005783-endoplasmic reticulum
- GO:0031090-organelle membrane
- GO:0005829-cytosol
- GO:0042127-regulation of cell proliferation
- GO:0044420-extracellular matrix part
- GO:0030182-neuron differentiation
- GO:0005739-mitochondrion
- GO:0007268-synaptic transmission
- GO:0010033-response to organic substance
- GO:0019899-extrinsic to membrane
- GO:0001866-response to hypoxia
- GO:0014070-response to organic cyclic substance
- GO:0070482-response to oxygen levels
- GO:0006928-cell motion
- GO:0044092-negative regulation of molecular function
- GO:0009991-response to extracellular stimulus
- GO:0010243-response to organic nitrogen
- GO:0050767-regulation of neurogenesis
- GO:0000267-cell fraction
- GO:0005794-Golgi apparatus
- GO:0044456-synapse part
- GO:0045202-synapse
- GO:0005626-insoluble fraction
- GO:0031410-cytoplasmic vesicle
- GO:0031982-vesicle
- GO:0015935-small ribosomal subunit
- GO:0010035-response to inorganic substance
- GO:0010810-regulation of cell-substrate adhesion
- GO:0051969-regulation of transmission of nerve impulse
- GO:0022627-cytosolic small ribosomal subunit
- GO:0050804-regulation of synaptic transmission
- GO:0008284-positive regulation of cell proliferation
- GO:0048870-cell motility
- GO:0051674-localization of cell
- GO:0050954-sensory perception of mechanical stimulus
- GO:0051094-positive regulation of developmental process
- GO:0030424-axon
- GO:0008038-neuron recognition
- GO:0032268-regulation of cellular protein metabolic process
- GO:0009628-response to abiotic stimulus
- GO:0035249-synaptic transmission, glutamatergic
- GO:0010563-negative regulation of phosphorus metabolic process
- GO:0045936-negative regulation of phosphate metabolic process
- GO:0005516-calmodulin binding
- GO:0042326-negative regulation of phosphorylation
- GO:0001944-vasculature development
- GO:0044429-mitochondrial part
- GO:0001568-blood vessel development
- GO:0005539-glycosaminoglycan binding
- GO:0051338-regulation of transferase activity
- GO:0031988-membrane-bounded vesicle
- GO:0048839-inner ear development
- GO:0045596-negative regulation of cell differentiation
- GO:0031226-intrinsic to plasma membrane
- GO:0031983-vesicle lumen
- GO:0005887-integral to plasma membrane
- GO:0006816-calcium ion transport
- GO:0060205-cytoplasmic membrane-bounded vesicle lumen
- GO:0010038-response to metal ion
- GO:0005262-calcium channel activity
- GO:0030054-cell junction

8  
6  
4  
2

T18 XO T13 T22
